# Supplementary figures and images for: Closing the Energy Balance using a Canopy Heat Capacity – Aphysically based Approach for the Land Component JSBACHv3.11
Source: Copernicus journal article supplement (doi:10.5194/gmd-2018-17), 2018-02-27

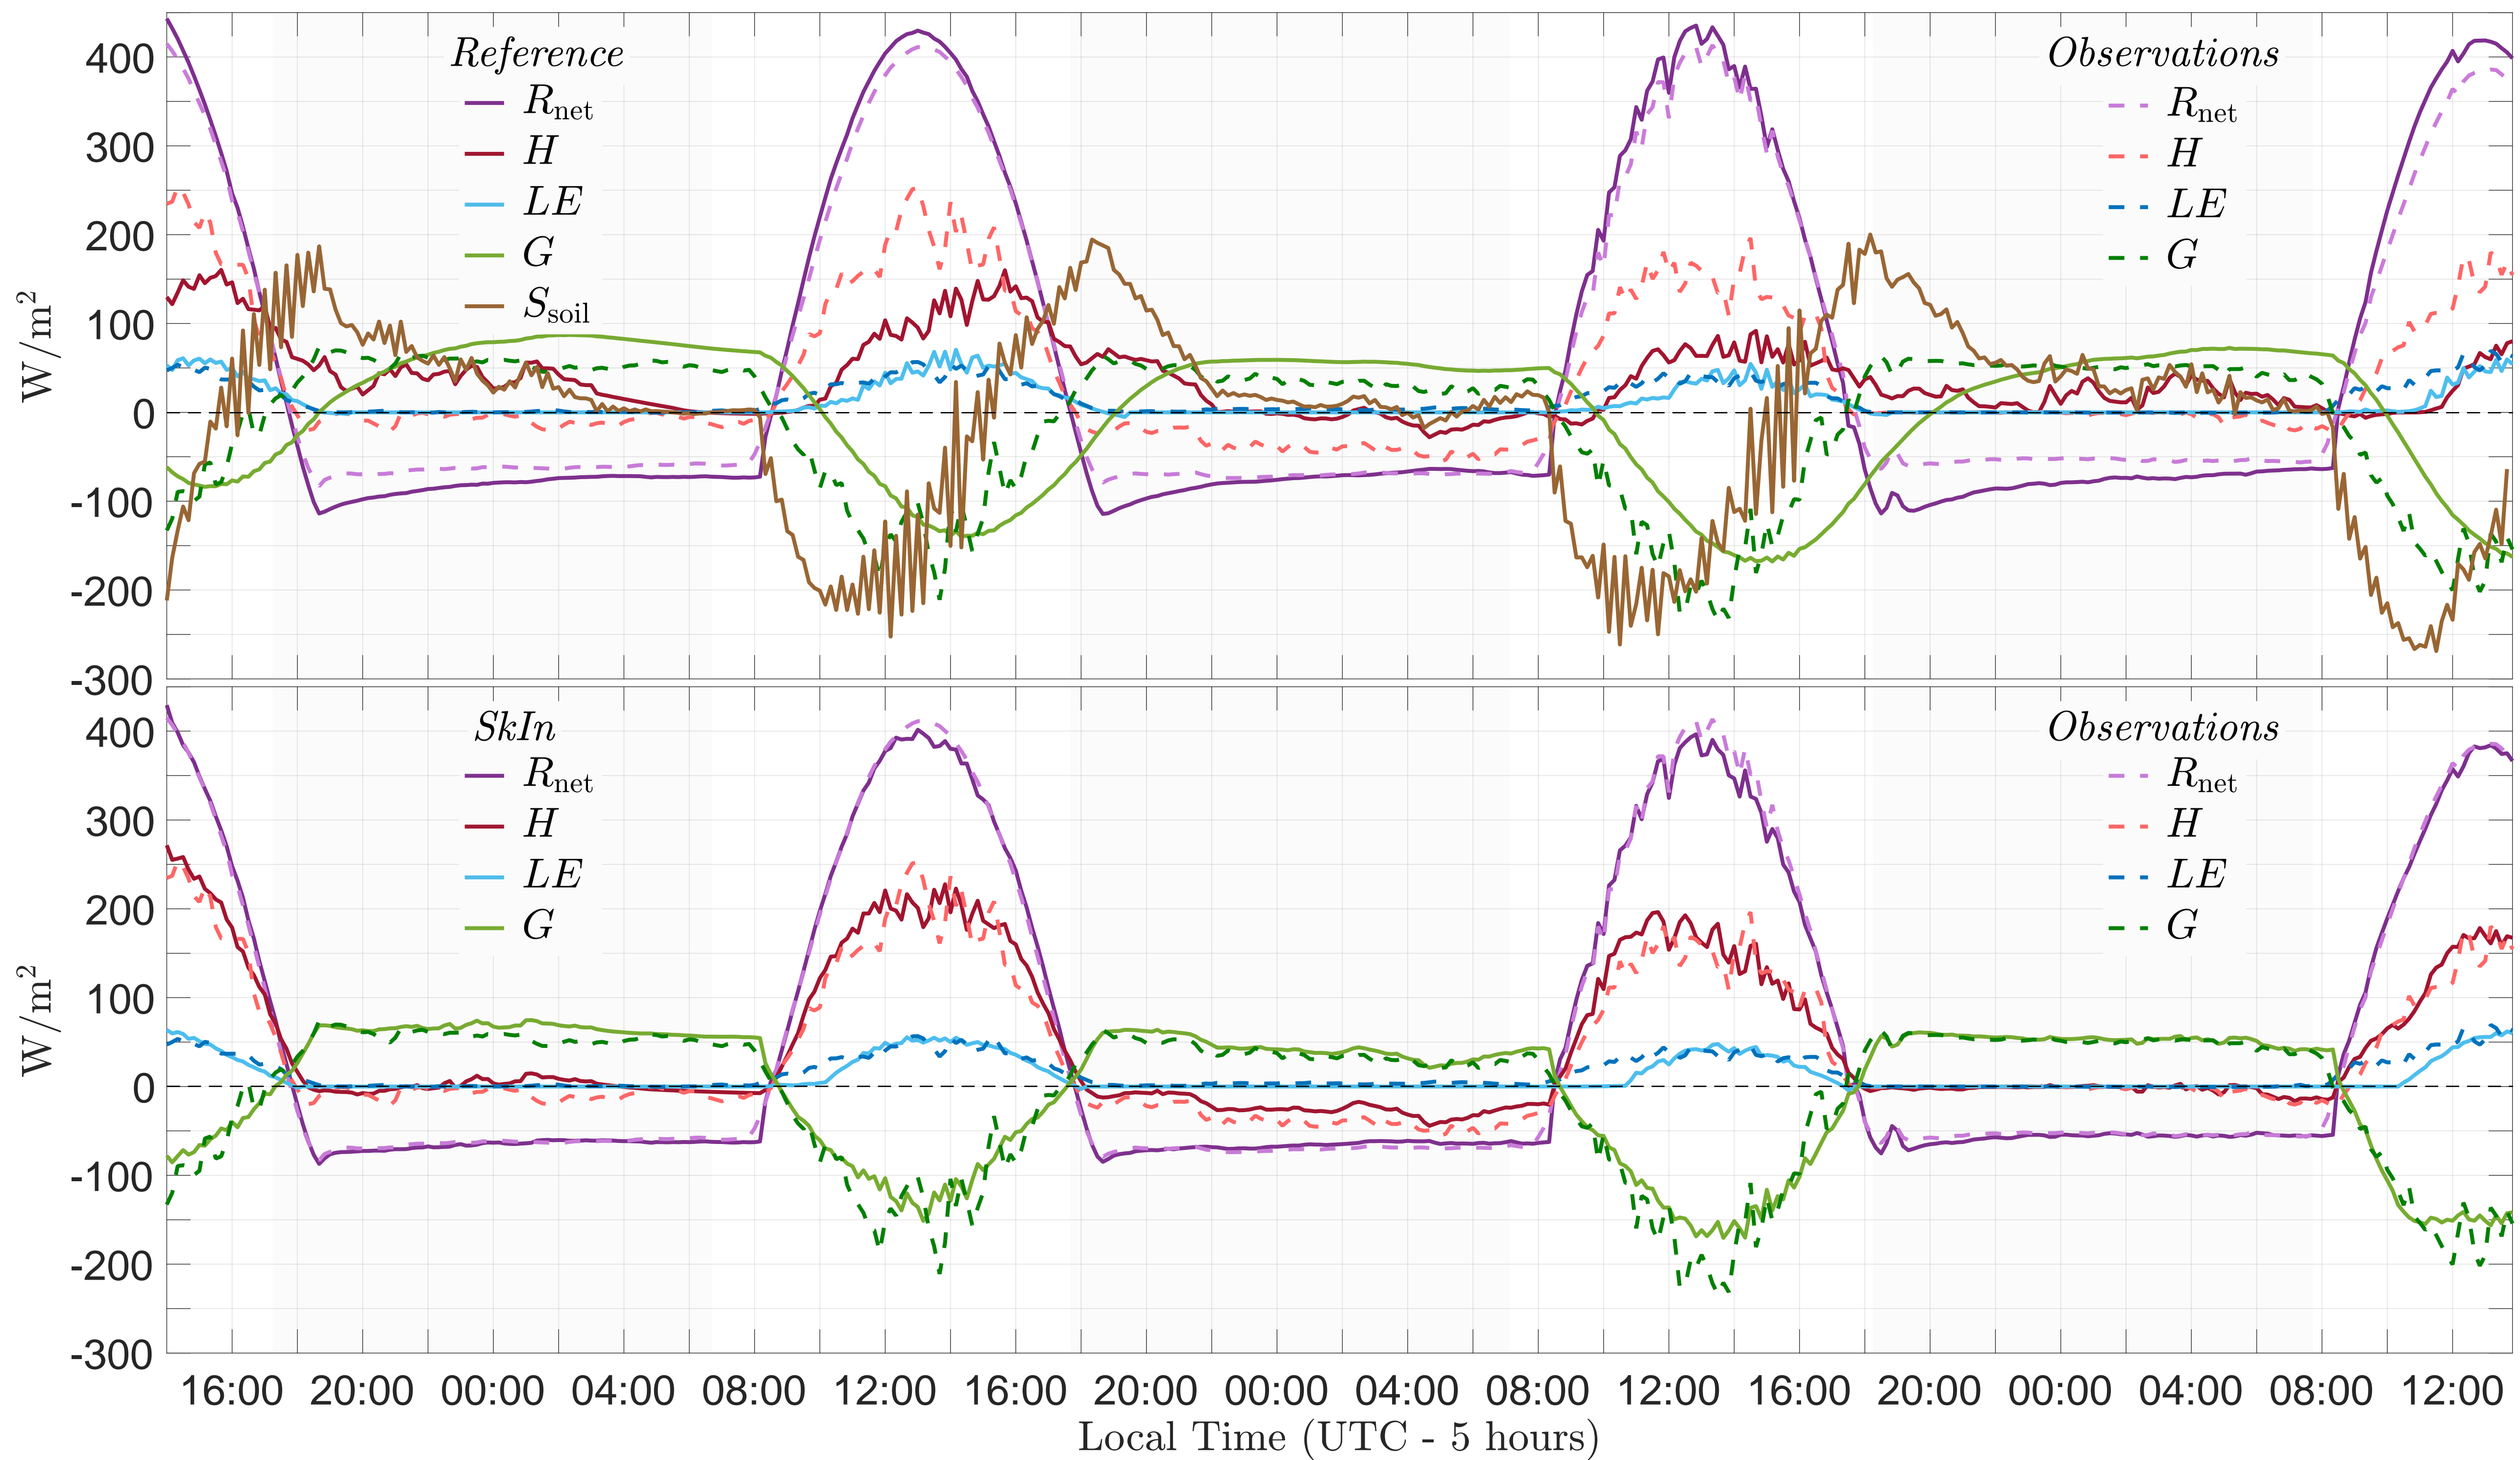

Supplement: Supplementary file 1 [file gmd-2018-17-supplement.zip]

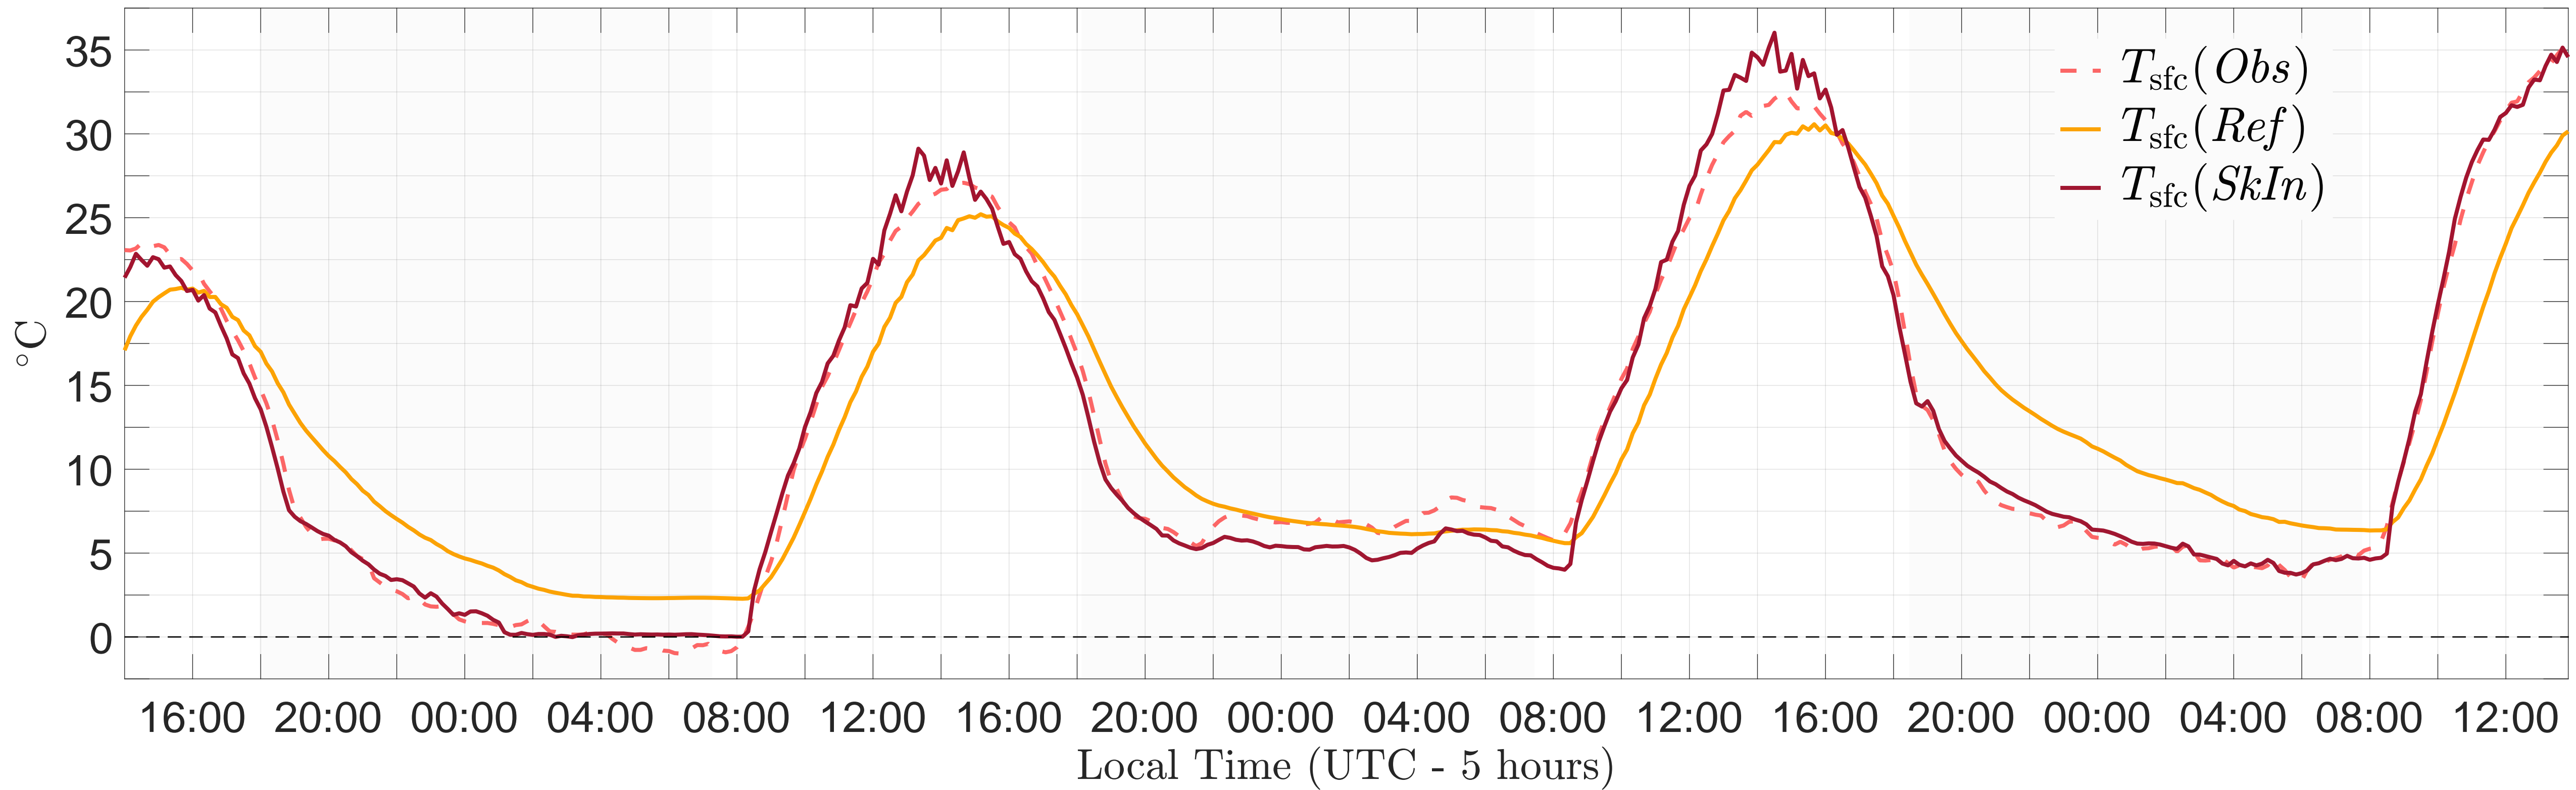

Supplement: Supplementary file 2 [file gmd-2018-17-supplement.zip]

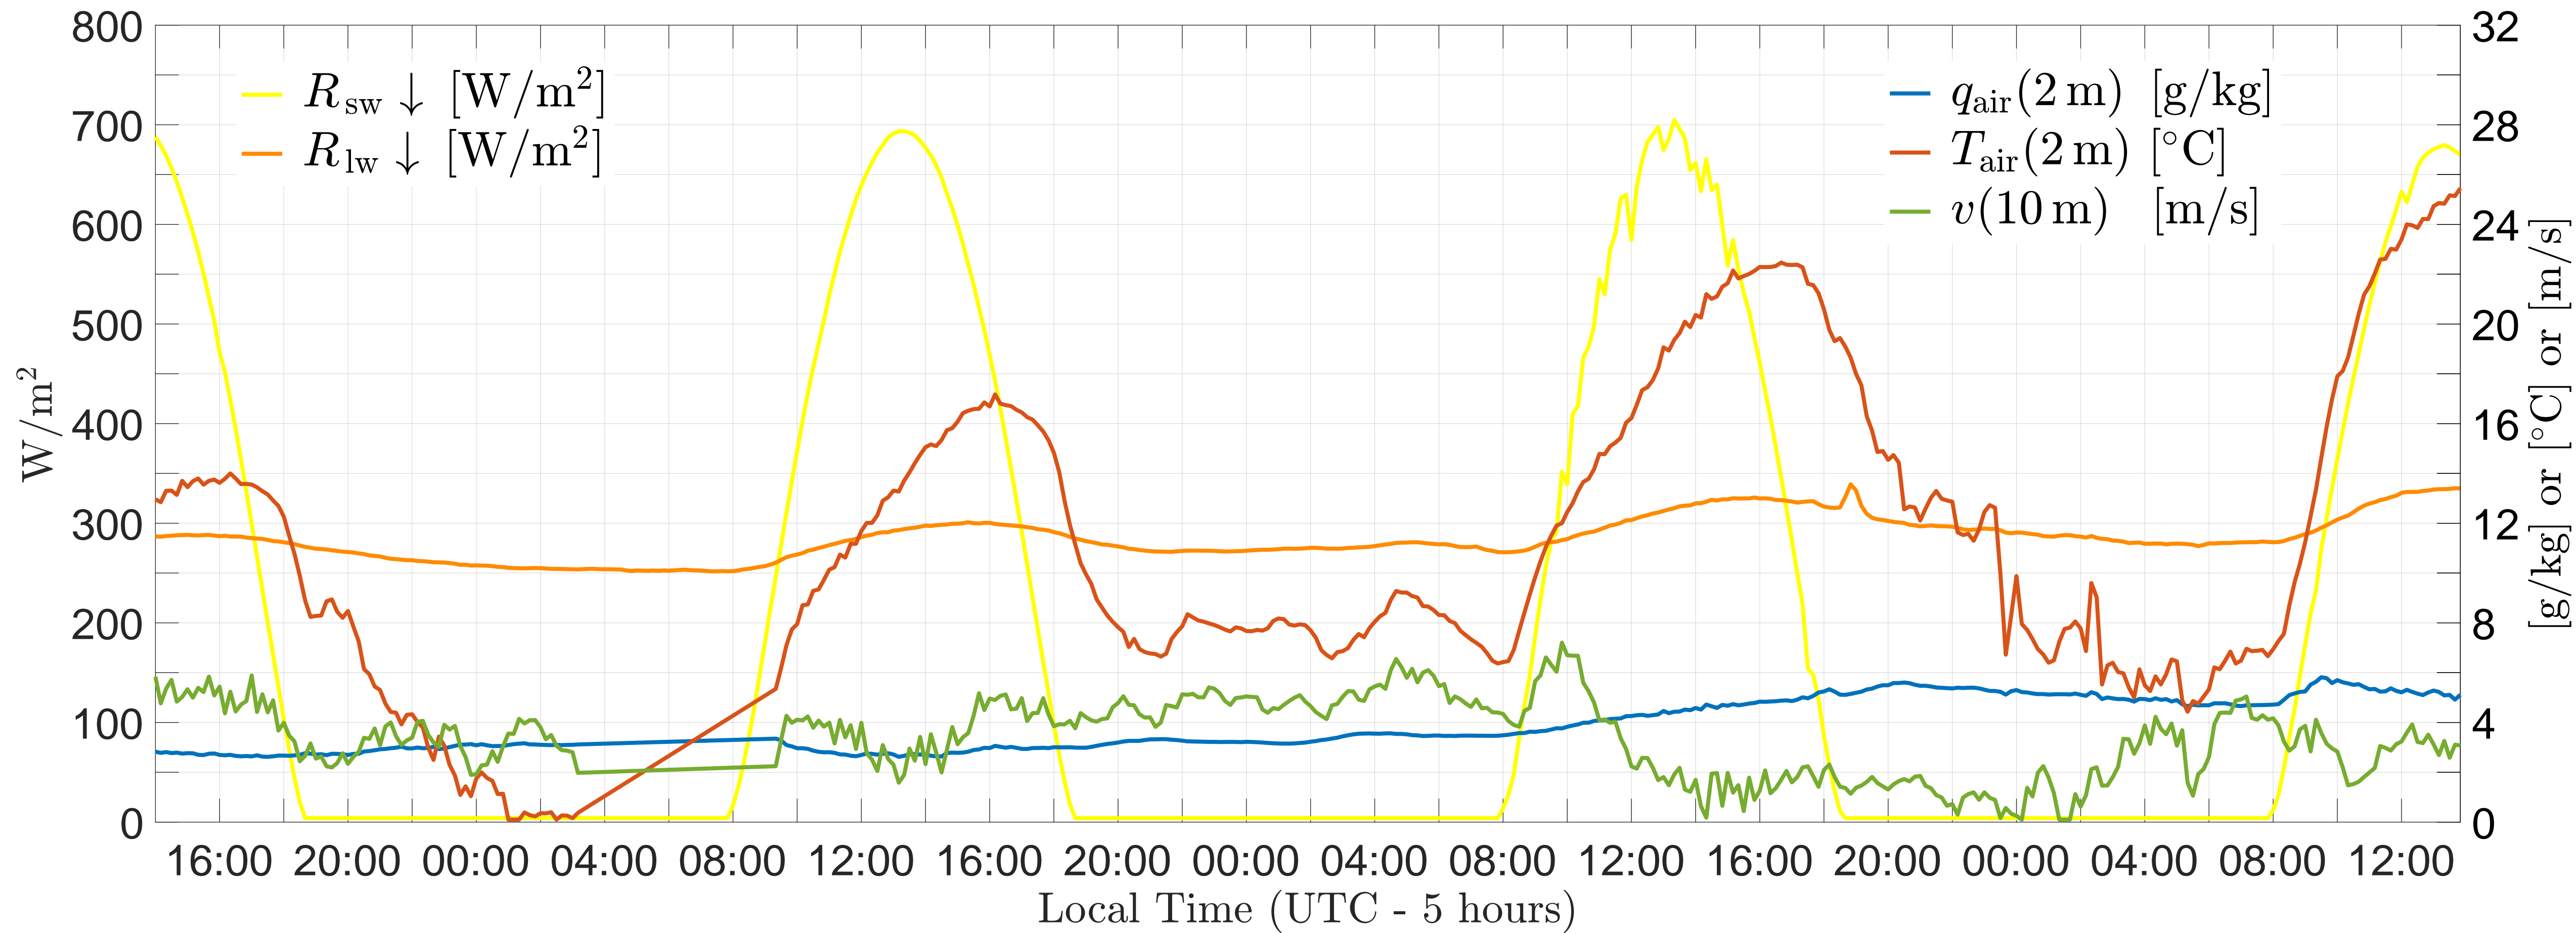

Supplement: Supplementary file 3 [file gmd-2018-17-supplement.zip]

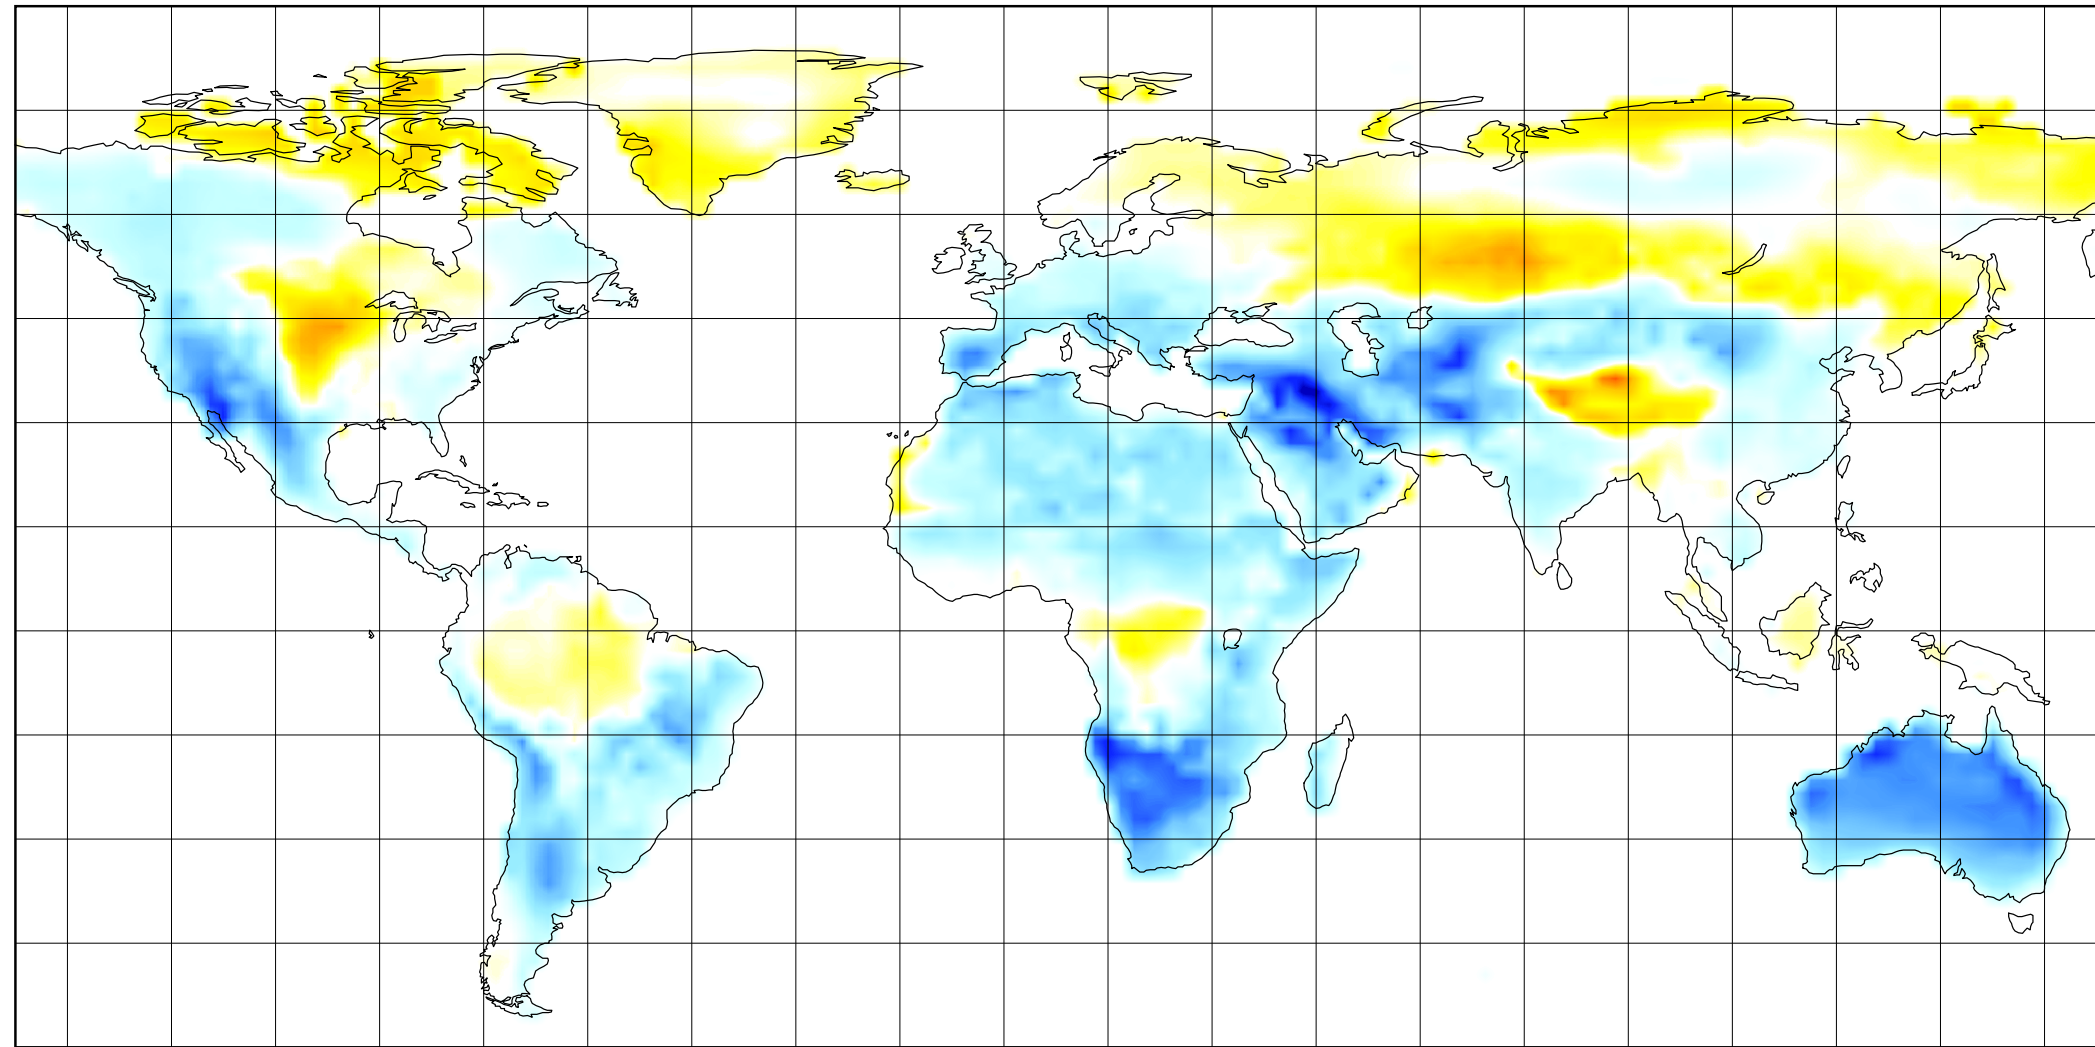

$\Delta T$  (Skin - Reference) [K]

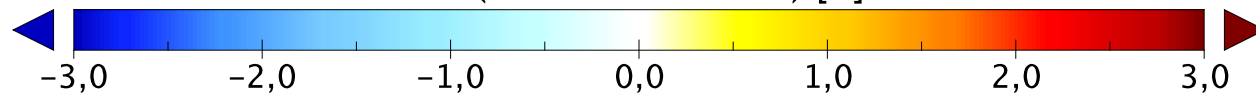

Supplement: Supplementary file 4 [file gmd-2018-17-supplement.zip]

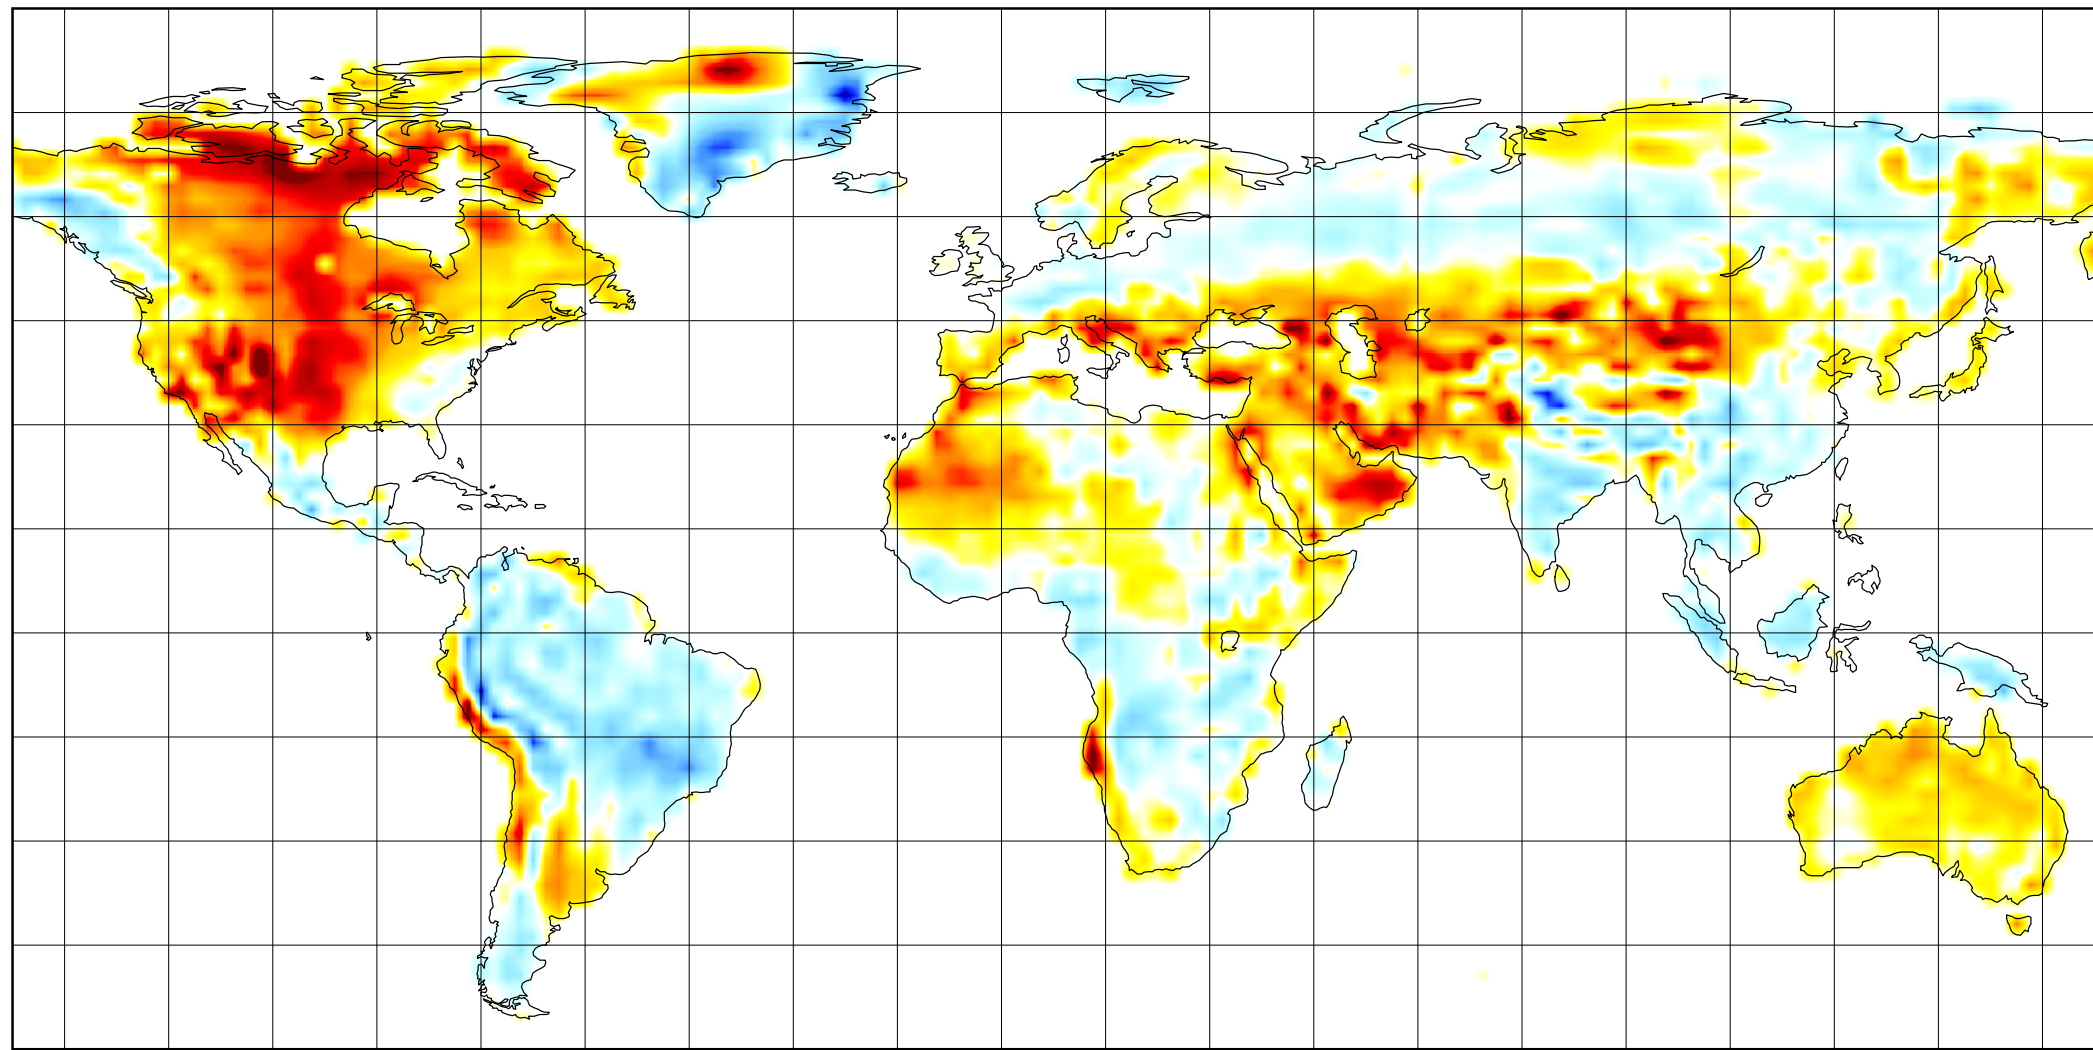

$\Delta T$  (Reference - Observations) [K]

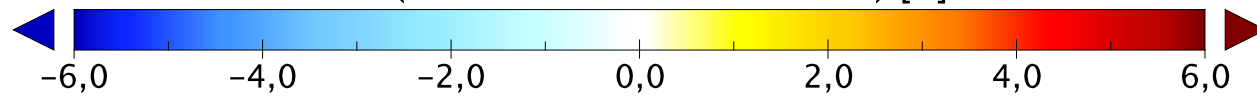

Supplement: Supplementary file 5 [file gmd-2018-17-supplement.zip]

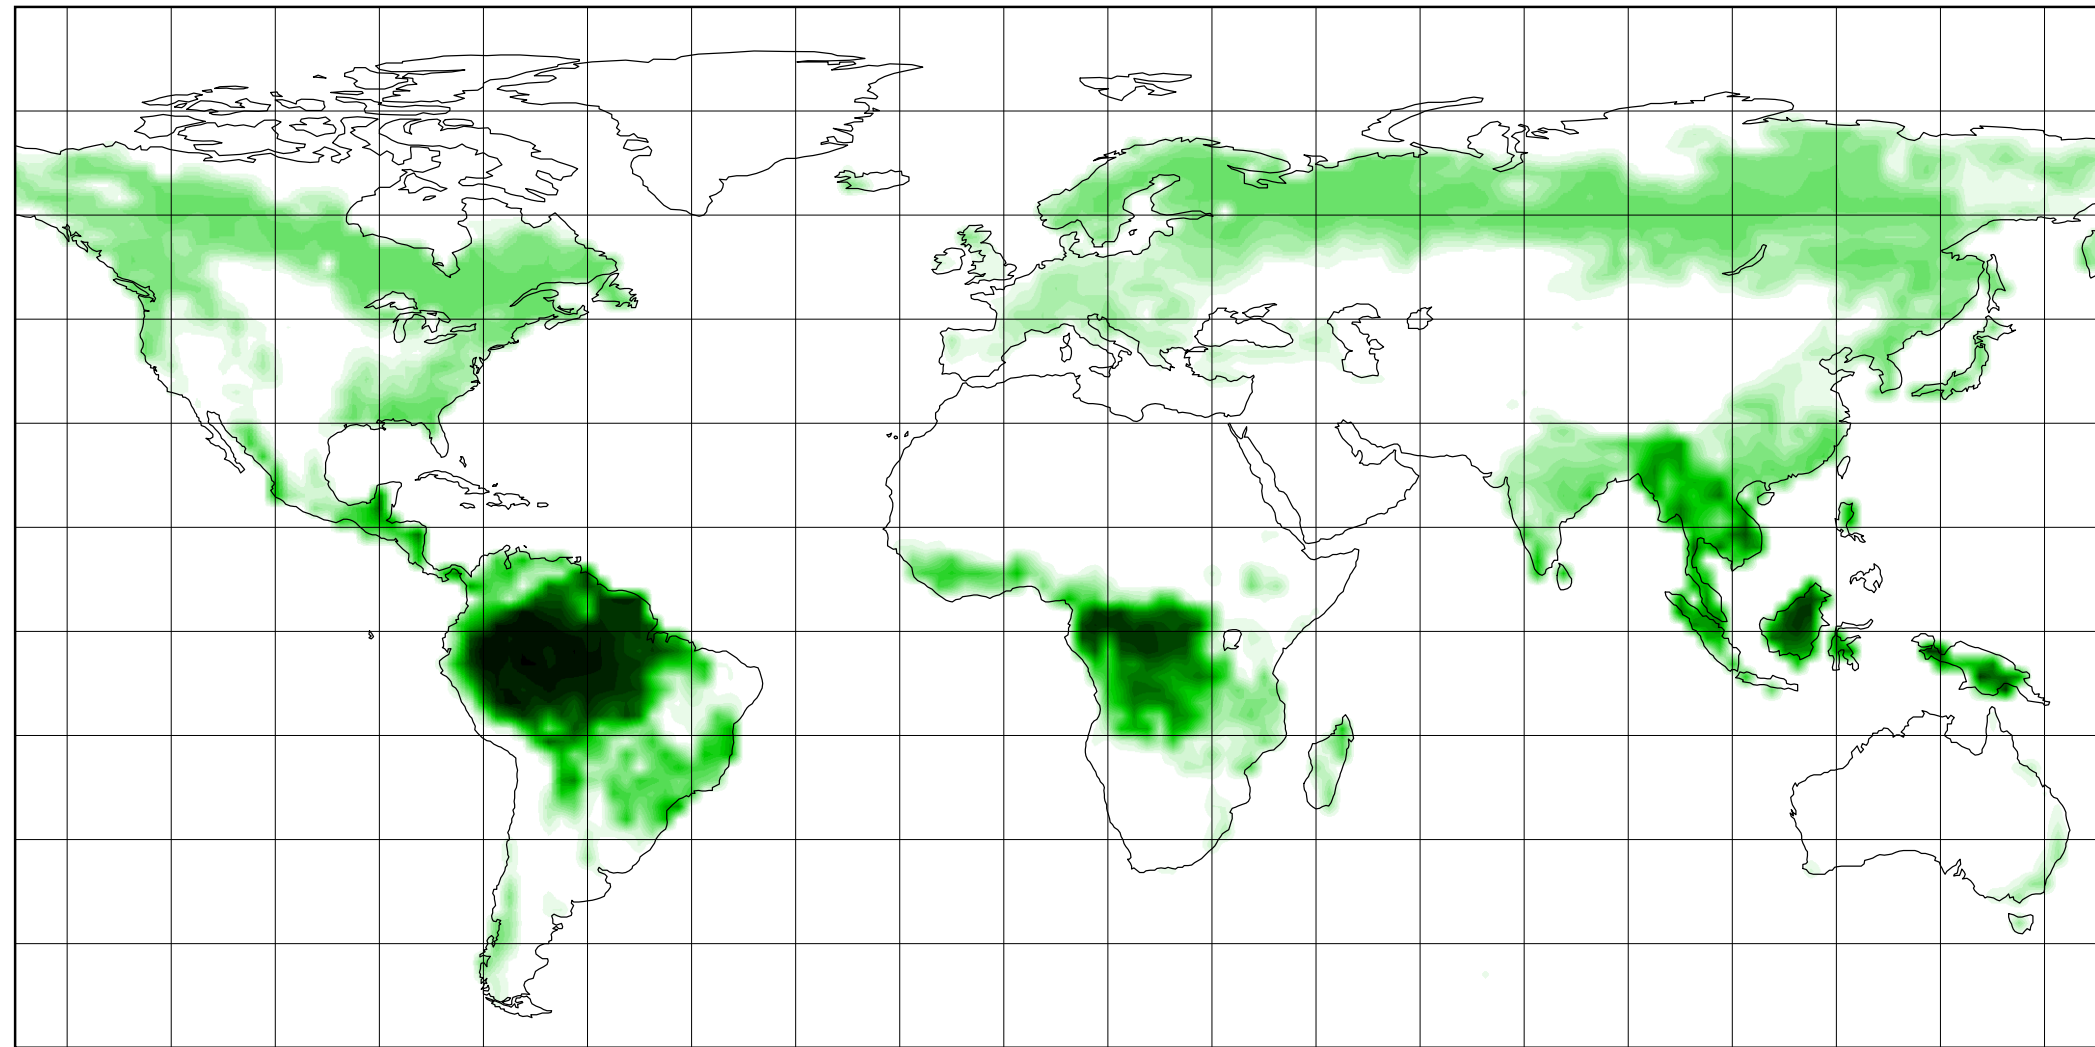

Canopy Heat Capacity [ $\text{kJ}/(\text{m}^2\text{K})$ ]

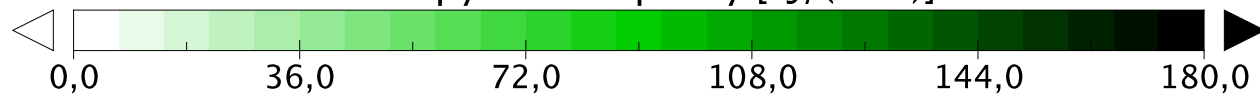

Supplement: Supplementary file 6 [file gmd-2018-17-supplement.zip]
